# Supplementary material
Source: publisher figshare collection journal article supplement (https://asha.figshare.com/ndownloader/files/36483321)
Supplement: Supplementary file 1 [file 36483321]

## Sheet: Sheet1
Supplemental material, Jagadeesh & Uppunda, "Effect of Age on Informational Masking: Differential Effects of Phonetic and Semantic Information in the Masker," AJA, https://doi.org/10.1044/2022_AJA-22-00029
Supplemental Material S1. Individual thresholds at each octave frequencies for both ears, across the two groups, as well as information regarding the amplitudes of OAEs and the gender information for both groups.
Group	Right_250 Hz	Right_500 Hz	Right_1000 Hz	Right_2000 Hz	Right_4000 Hz	Right_8000 Hz	Left_250 Hz	Left_500 Hz	Left_1000 Hz	Left_2000 Hz	Left_4000	Left_8000 Hz	Age	OAE_right	OAE_left	Gender
Younger	10	5	10	10	10	10	10	5	15	10	15	10	24	7.3	6.8	f
Younger	5	10	5	5	10	10	5	10	5	0	10	5	23	9.2	9.9	m
Younger	0	0	0	0	5	5	0	5	0	0	10	10	32	6.4	7.8	f
Younger	10	5	5	0	5	10	5	5	5	0	5	10	19	15.2	15.3	m
Younger	0	-5	0	5	0	-5	0	0	0	5	5	0	23	12.9	14.1	f
Younger	5	5	5	0	10	10	5	5	5	5	10	10	25	12.4	10.8	f
Younger	5	5	0	5	5	5	5	5	5	0	5	5	30	0.9	2.3	f
Younger	10	5	5	10	5	5	10	5	10	5	5	5	23	14.3	13.1	m
Younger	10	5	5	5	10	15	10	5	10	10	10	5	22	6.5	6.6	m
Younger	5	5	5	10	5	10	5	5	0	10	5	5	23	12.3	13.4	f
Younger	5	10	10	10	10	15	5	5	10	10	10	10	27	1.7	4.5	m
Younger	5	10	5	10	10	5	10	15	10	10	10	10	28	14.1	12.4	f
Younger	10	10	10	10	10	10	10	10	5	10	10	10	23	16.6	16.4	m
Younger	10	5	10	10	15	5	10	10	10	5	10	15	24	12.1	13.2	m
Younger	10	10	10	10	10	15	10	10	10	10	10	10	24	1.3	2	m
Younger	10	10	15	10	5	10	10	10	10	5	10	5	23	4	2.9	m
Younger	10	10	10	10	15	10	10	5	10	10	10	15	23	14.1	14.8	m
Younger	5	10	10	5	10	5	5	10	10	10	5	10	24	10.4	11.1	m
Younger	10	10	10	10	15	10	10	5	10	10	10	10	25	5.8	3.4	m
Younger	10	10	15	10	10	10	15	10	5	10	10	10	20	17.3	15.8	m
Younger	5	5	5	10	5	5	5	10	10	5	5	5	24	8.9	7.8	f
Younger	5	5	0	0	0	5	5	5	0	5	0	0	19	0.1	0.4	f
Younger	10	10	5	5	5	10	5	5	5	5	5	10	24	1.7	0.9	f
Younger	0	0	5	0	5	0	0	0	0	10	0	5	19	9.4	8.1	m
Younger	10	15	10	10	15	10	10	10	15	10	10	10	23	16.7	16.9	f
Younger	10	5	5	10	10	5	10	5	10	10	10	10	21	5.2	5.5	m
Younger	10	5	10	15	15	5	15	10	10	5	5	5	20	7.8	8.2	m
Younger	5	5	5	10	5	10	10	5	5	5	10	5	24	10.8	9.9	m
Younger	10	10	5	10	10	5	10	15	10	5	5	10	23	10.2	8.8	m
Younger	10	5	5	5	5	10	5	10	0	0	5	10	23	3.9	5.8	m
Older	5	5	0	5	5	5	5	0	0	5	0	5	58	5.6	5.9	f
Older	10	5	10	10	10	15	10	5	10	5	10	10	54	7.1	5.7	f
Older	15	15	10	15	15	20	10	15	10	15	10	15	61	4.8	6.6	m
Older	10	10	10	10	10	35	15	15	15	15	15	10	54	12.8	11.4	f
Older	15	10	15	15	15	30	15	15	10	10	15	25	54	12.3	13.2	f
Older	10	10	10	5	20	15	10	10	15	10	25	15	54	9.8	10.5	m
Older	10	10	10	10	10	15	10	10	10	10	15	15	56	0.2	0.4	f
Older	10	5	10	10	15	20	10	10	10	15	15	20	56	12.8	11.8	m
Older	5	5	0	10	10	10	5	10	10	10	10	10	52	7.6	6.5	f
Older	10	5	10	10	15	15	15	10	15	15	10	15	58	15.1	15.3	m
Older	5	5	10	10	15	20	10	10	15	15	20	20	60	0.2	1.3	m
Older	0	5	0	0	0	5	5	10	10	10	15	35	53	14.2	12.8	f
Older	10	10	15	10	15	20	10	10	10	5	15	15	65	12.6	11.9	m
Older	10	15	10	15	10	20	10	10	15	10	15	20	61	14.8	13.1	m
Older	10	15	10	10	20	35	10	10	10	20	20	20	61	-3.3	0.1	f
Older	5	10	10	5	5	10	10	10	10	10	15	10	54	4.3	4.8	f
Older	5	10	10	5	5	5	5	5	5	5	10	5	54	12.1	12.9	f
Older	5	10	5	10	15	15	10	10	15	15	10	25	54	12.1	13	f
Older	5	10	5	5	10	5	10	10	10	15	15	20	65	6.4	7.1	m
Older	10	10	10	10	10	15	10	15	15	15	20	20	61	17.8	16.2	m
Older	10	10	10	15	10	15	10	15	15	15	20	20	50	11.2	10.8	f
Older	10	5	10	10	10	15	10	10	5	10	10	15	62	0.2	1	m
Older	10	5	5	10	15	25	10	5	5	5	10	15	64	0.7	0.9	m
Older	10	10	10	10	20	25	10	10	10	10	20	25	54	10.2	8.8	m
Older	5	5	10	10	10	15	5	10	10	5	10	15	58	16.5	16	m
Older	5	5	10	15	20	25	5	5	10	10	20	30	65	5.1	4.3	m
Older	5	5	5	0	5	5	5	5	5	5	10	5	53	5.7	4.9	f
Older	10	5	5	5	5	10	10	5	10	5	5	5	60	16.2	16	m
Older	10	15	15	10	10	15	10	10	10	15	10	15	53	11	12.2	f
Older	5	5	0	5	5	5	5	0	0	5	5	5	51	3.8	3.9	f
